# Supplementary figures and images for: Gut microbiota-derived propionate reduces cancer cell proliferation in the liver
Source: PubMed Central journal article supplement — Br J Cancer. 2012 Sep 13;107(8):1337–44. doi: 10.1038/bjc.2012.409 (PMC3494429; doi:10.1038/bjc.2012.409), 2012-09-13

A

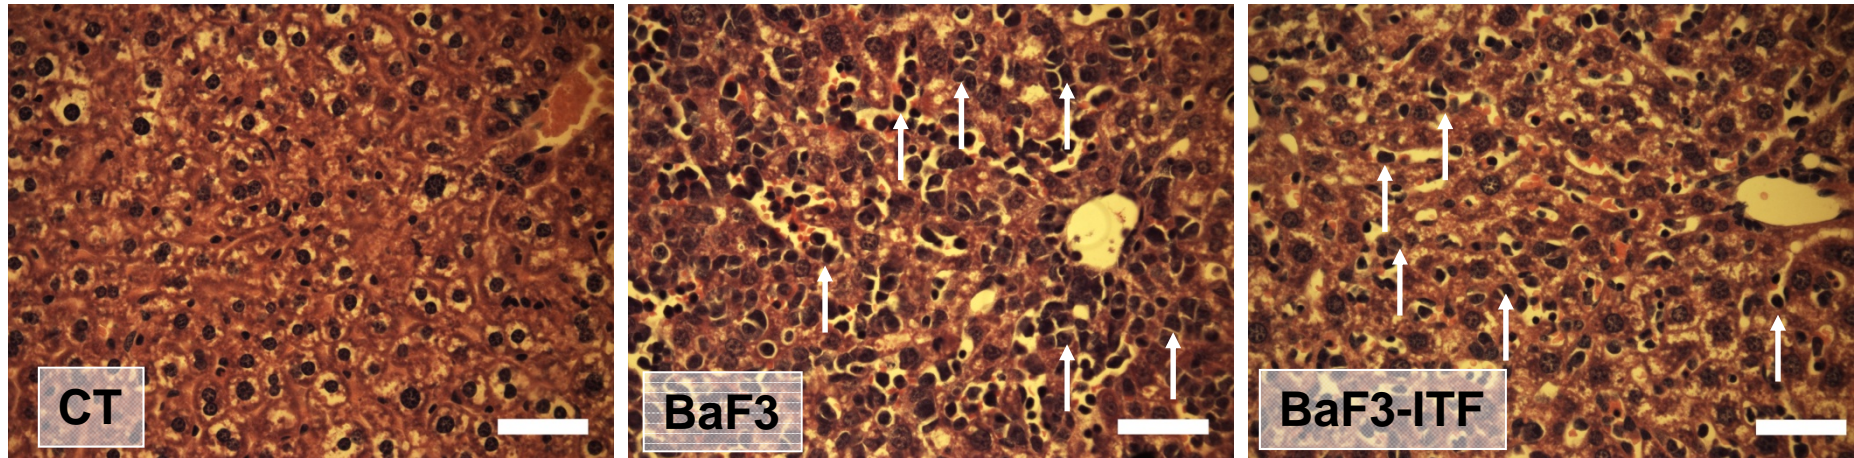

B

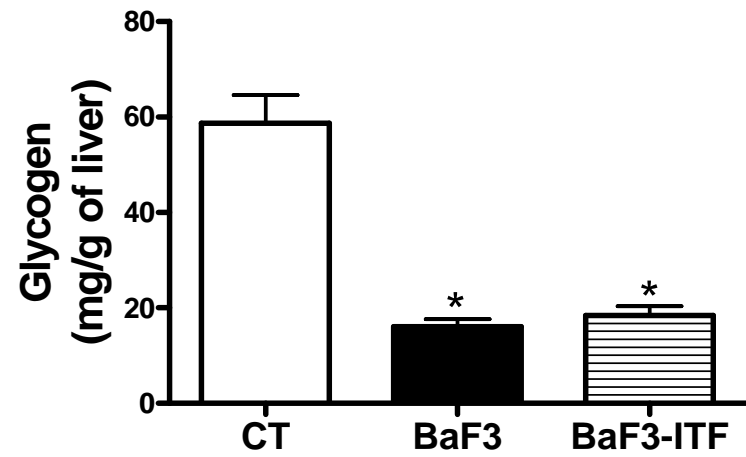

C

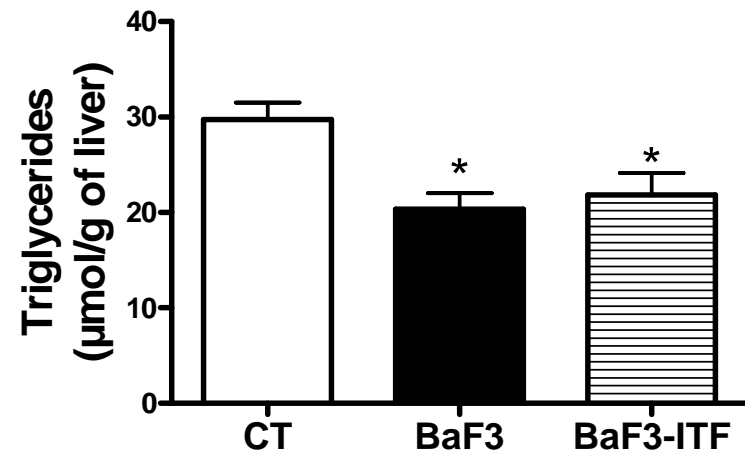

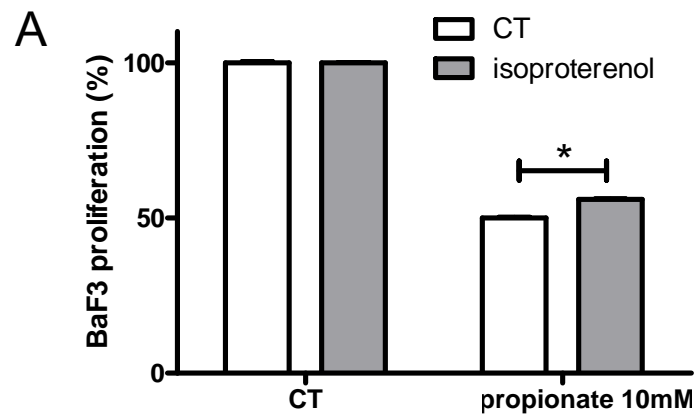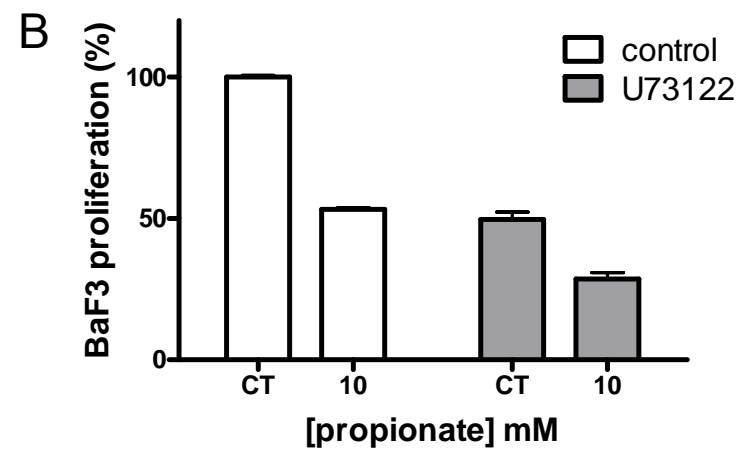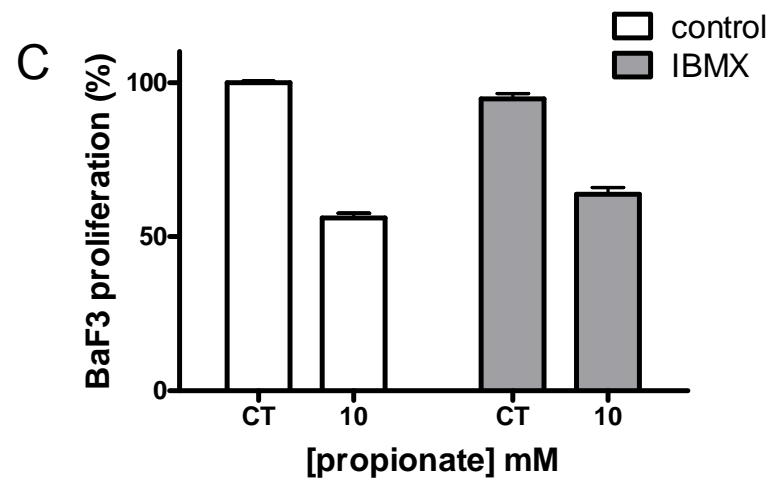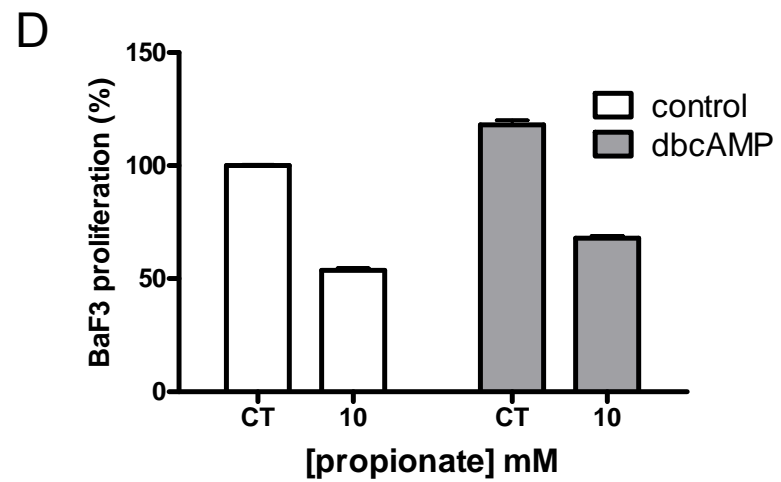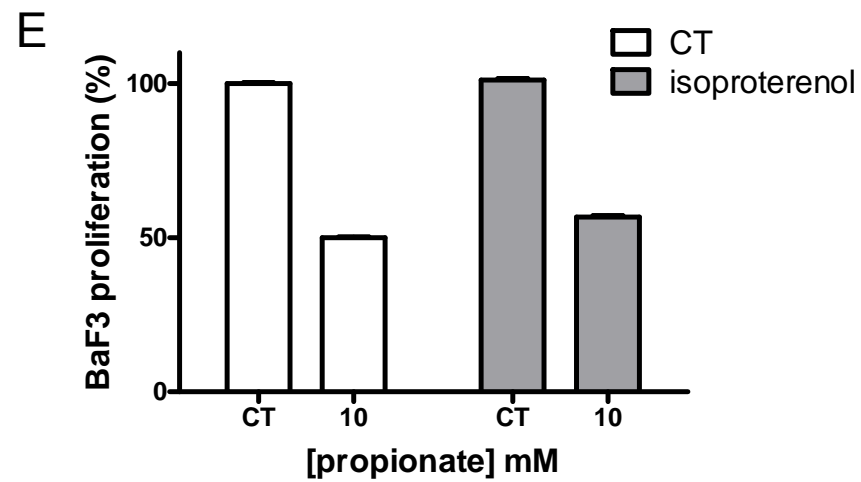

Sup Fig 2

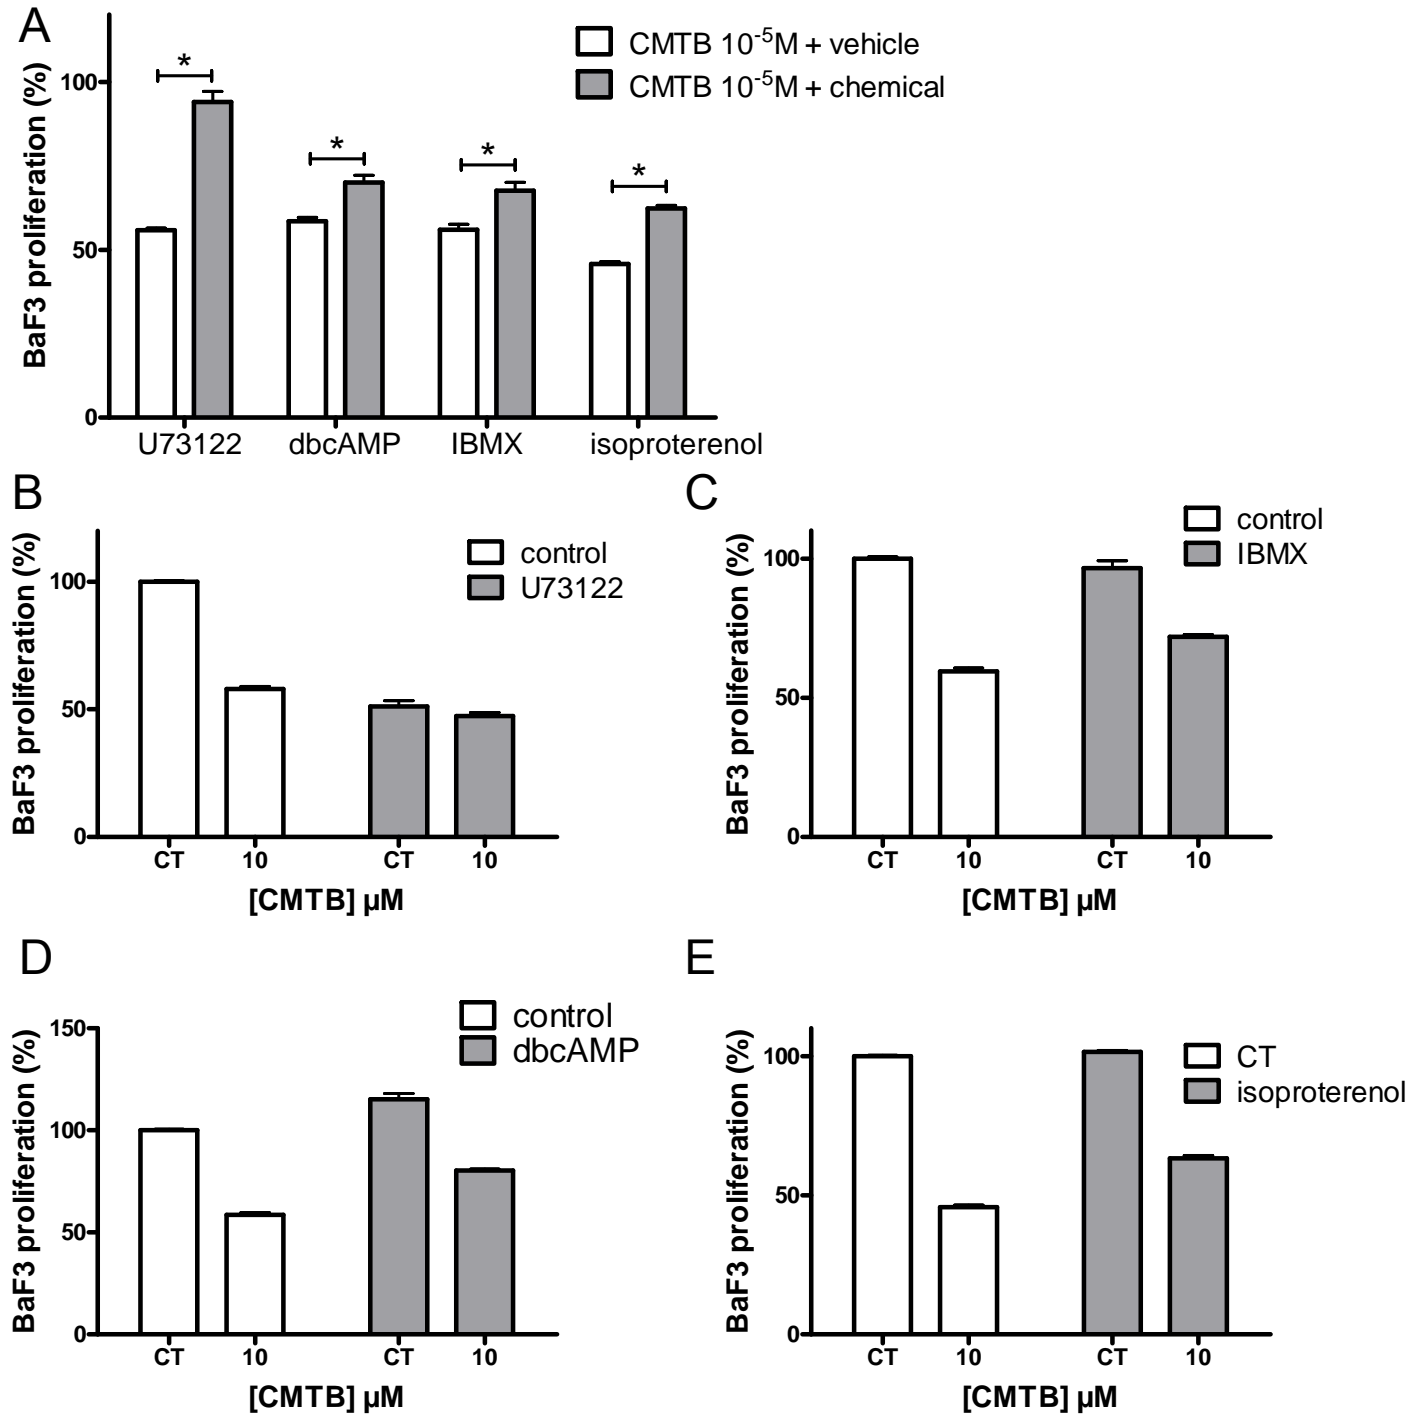

Suppl Fig 3

A

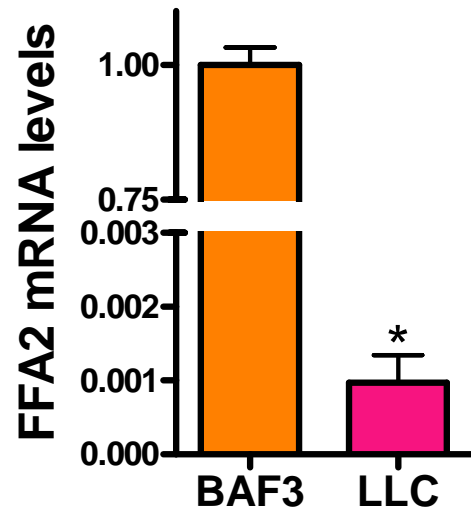

B

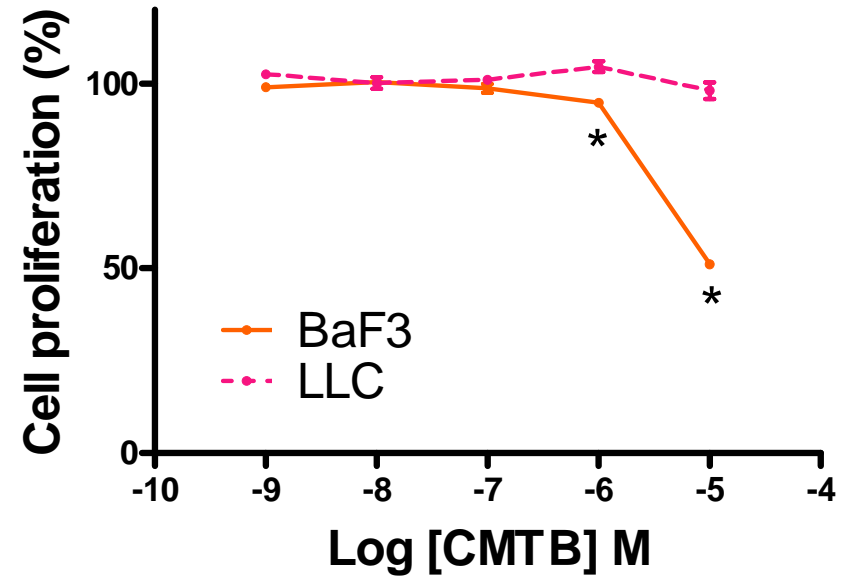

C

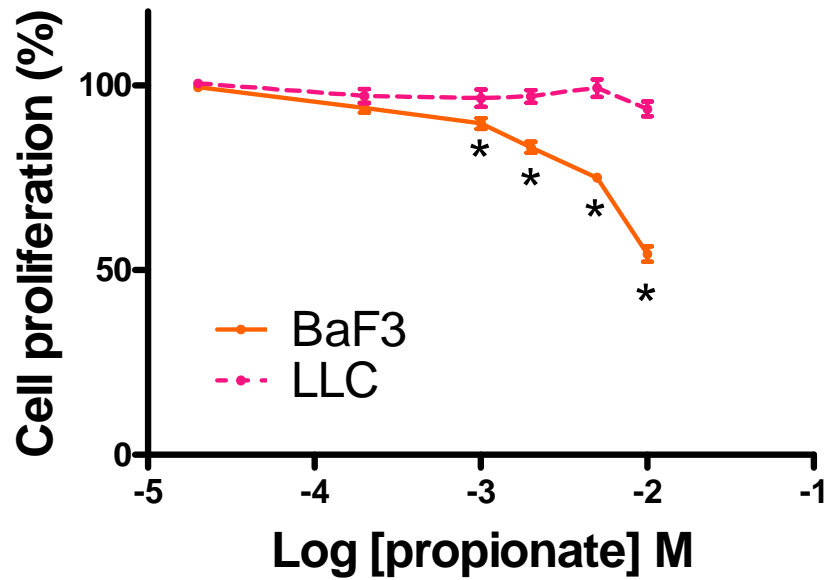

D

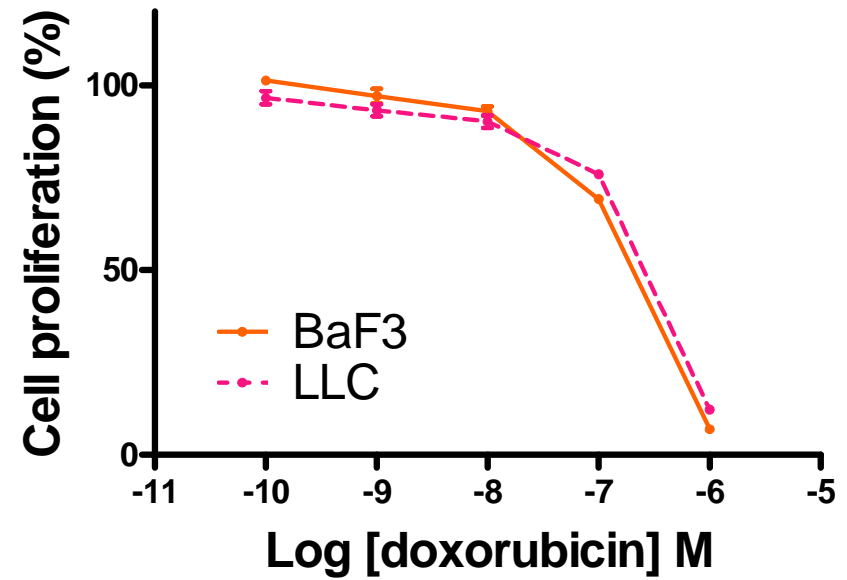

Supplement: bjc2012409x1.pdf [file bjc2012409x1.pdf]
